# Supplementary material for: A structure–property interplay between the width and height of cages and the static third order nonlinear optical responses for fullerenes: applying gamma density analysis
Source: Royal Society of Chemistry journal article supplement (doi:10.1039/c6cp06651h), 2016-12-08
Supplement: c6cp06651h1.pdf [file c6cp06651h1.pdf]

**Supporting Information for**  
**A structure–property interplay between width and height of cages**  
**and static third order nonlinear optical responses for fullerenes:**  
**applying gamma density analysis**

Li Wang,<sup>a</sup> Jin-Ting Ye,<sup>a</sup> He Chen,<sup>a</sup> Zhen-Zhen Chen,<sup>a</sup> Yong-Qing Qiu<sup>\*ab</sup> and Hai-  
Ming Xie<sup>\*ab</sup>

---

<sup>a</sup> *Institute of Functional Material Chemistry, Faculty of Chemistry, Northeast Normal University,*

*Changchun 130024, People's Republic of China*

*E-mail: [qiuyq466@nenu.edu.cn](mailto:qiuyq466@nenu.edu.cn) (Y. Q. Qiu); Fax: +86 431 85098768*

<sup>b</sup> *National & Local United Engineering Laboratory for Power Battery, Faculty of Chemistry,*

*Northeast Normal University, Changchun 130024, Jilin, People's Republic of China*

**Table S1** The width and height (Å) of fullerenes.

| Complex         | Width<br>h | Height |
|-----------------|------------|--------|
| C <sub>40</sub> | 5.54       | 4.83   |
| C <sub>50</sub> | 6.28       | 5.71   |
| C <sub>60</sub> | 6.59       | 6.60   |
| C <sub>70</sub> | 6.71       | 7.96   |
| C <sub>24</sub> | 4.45       | 3.18   |
| C <sub>36</sub> | 4.68       | 4.90   |
| C <sub>48</sub> | 6.22       | 4.75   |
| C <sub>72</sub> | 8.22       | 5.71   |

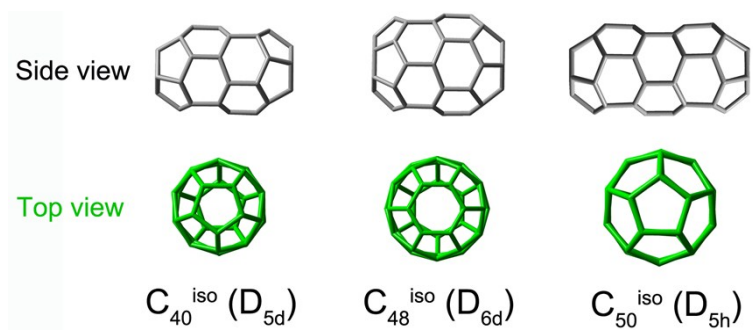

**Fig. S1** The isomers of fullerenes  $C_{40}$ ,  $C_{48}$  and  $C_{50}$  in their highest possible symmetries, which are  $D_{5d}$ ,  $D_{6d}$ , and  $D_{5h}$ , respectively.
